# Supplementary material for: Exacerbated inflammatory arthritis in response to hyperactive gp130 signalling is independent of IL-17A
Source: HighWire-hosted journal article supplement (doi:10.1136/annrheumdis-2013-203771), 2013-07-27
Supplement: annrheumdis-2013-203771supp_methods.pdf [file annrheumdis-2013-203771supp_methods.pdf]

## **ONLINE SUPPLEMENTARY METHODS**

### **Antigen-induced arthritis (AIA)**

Adult (8-12 week old) mice were immunized with a subcutaneous injection of 100 µl mBSA (1 mg/ml; Sigma-Aldrich), emulsified in an equal volume of Complete Freund's Adjuvant (CFA). Mice also received an intraperitoneal administration of heat-inactivated *Bordetella pertussis* toxin (160 ng; Sigma-Aldrich). After 7 days, mice were re-immunized with a second identical subcutaneous administration of mBSA in CFA. Twenty-one days after the initial immunization, inflammatory arthritis was triggered by intra-articular administration of 10 µl mBSA (10 mg/ml) into the right knee joint. Animals were monitored daily for arthritis development by measuring knee joint diameters using a POCO 2T micrometer (Kroeplin). Mice were culled at defined time-points and joint pathology assessed histologically. Accumulative arthritic scores were generated according to the severity of synovial infiltration, exudate, hyperplasia, and joint erosion (see below).

### **Histopathology and immunohistochemistry**

Knee joints were fixed in neutral buffered formalin (10% v/v) and decalcified in 10% (v/v) formic acid at 4°C before embedding in paraffin. Midsagittal serial sections (7 µm thick) were stained with haematoxylin, safranin-O and fast green. Two independent observers, blinded to the experimental groups, scored the sections for subsynovial inflammation (0 = normal, to 5 = ablation of adipose tissue due to leukocyte infiltrate), synovial exudate (0 = normal, to 3 = substantial number of cells with large fibrin deposits), synovial hyperplasia (0 = normal 1-3 cells thick, to 3 = over three layers thick with overgrowth onto joint surfaces with evidence of cartilage/bone erosion), and cartilage/bone erosion (0 = normal, 3 = destruction of a significant part of the bone). The aggregate score for all parameters is presented as the arthritic index (AI).

Synovial T-cell infiltration was detected in paraffin sections using a rabbit antibody to murine CD3 (DakoCytomation). Antigen unmasking was achieved by heating in 10 mM sodium citrate buffer containing 0.05% Tween 20 (95°C, 40 min). Endogenous peroxidase and biotin activity was blocked using 3% H<sub>2</sub>O<sub>2</sub> and an avidin/biotin blocking kit (Vector Laboratories) respectively. Sections were incubated in 10% (v:v) swine serum for 1 hour before overnight antibody incubation at 4°C. Antibody labelling was detected using a biotinylated swine anti-rabbit secondary antibody (DakoCytomation), the Vectastain ABC kit and diaminobenzidine chromagen (Vector Laboratories). Two independent observers scored the degree of CD3 staining from 0 (no staining) to 4 (large number of positive cells) as described previously<sup>13</sup>.

**Flow cytometry**

For intracellular cytokine detection, *in vitro* cell cultures or single cell suspensions prepared from inguinal lymph nodes were treated with PMA (50 ng/ml), ionomycin (500 ng/ml) and monensin (3  $\mu$ M) for 4 hours at 37°C. Cells were stained with antibodies to cell surface CD4 (clone RM4-5), fixed and permeabilised using Cytofix/Cytoperm (BD Biosciences), before cytokine detection using anti-IFN- $\gamma$  (XMG1.2) and anti-IL-17A (TC11-18H10.1). Cells were acquired on a CyAn ADP (Beckman Coulter) or FACSCanto II flow cytometer (BD Biosciences) and analysed using FlowJo (Tree Star Inc.).

**Enzyme-linked immunosorbent assay (ELISA).**

IL-17A levels were quantified in cell culture supernatants using a commercial murine IL-17A ELISA (Duoset kit from R&D Systems).
